# Supplementary material for: Self-rated oral health among elderly patients attending a university dental hospital in Thailand: a telephone-based cross-sectional survey study
Source: PeerJ. 2022 Oct 10;10:e14191. doi: 10.7717/peerj.14191 (PMC9558616; doi:10.7717/peerj.14191)
Supplement: Supplemental Information 1 — The raw data were used for statistical analysis to explore the potential factors associated with self-rated oral health among elderly patients attending a university dental hospital in Thailand. [file peerj-10-14191-s001.xlsx]

## Sheet: SPSS Research (5-5-22)
ID	Age	AgeGroup	Sex	Education	Income	BrushFrequency	BrushDuration	DentalCare	Smoking	Drinking	Chewing	ChewingGroup	Speaking	SpeakingGroup	SROH	SROH_Gr
1	66	0	0	0	1	0	0	1	0	0	1	1	0	0	2	1		SROH	Self-rated oral health
2	69	0	0	0	0	0	0	0	0	0	2	1	0	0	2	1		SROH_G	Self-rated oral health group
3	67	0	1	0	1	0	0	0	0	0	0	0	0	0	0	0
4	63	0	0	0	1	0	0	0	0	0	0	0	0	0	1	0
5	72	0	0	0	0	0	0	0	0	0	1	1	0	0	1	0
6	68	0	0	0	1	0	0	0	0	0	0	0	0	0	1	0
7	66	0	0	0	0	0	1	0	0	0	1	1	0	0	1	0
8	62	0	1	0	1	0	1	1	0	0	0	0	0	0	0	0
9	63	0	1	0	0	0	0	0	0	0	0	0	0	0	0	0
10	66	0	1	0	0	0	0	0	0	0	0	0	0	0	0	0
11	62	0	0	0	0	0	1	0	0	0	2	1	1	1	2	1
12	76	1	0	0	0	0	0	0	0	0	0	0	0	0	0	0
13	68	0	0	0	0	0	1	1	0	0	1	1	0	0	1	0
14	68	0	0	1	1	9	9	0	0	0	0	0	0	0	1	0
15	70	0	1	0	0	1	0	1	1	1	0	0	0	0	1	0
16	63	0	0	0	0	0	0	0	0	0	0	0	0	0	1	0
17	70	0	0	0	0	0	0	0	0	0	0	0	0	0	1	0
18	69	0	1	0	0	1	0	1	0	0	1	1	0	0	1	0
19	71	0	0	0	1	0	0	0	0	0	0	0	0	0	1	0
20	64	0	0	0	1	0	1	0	0	0	1	1	0	0	2	1
21	73	0	0	0	0	0	0	0	0	0	0	0	0	0	0	0
22	61	0	0	0	0	0	0	0	0	0	0	0	0	0	1	0
23	62	0	0	0	0	0	0	0	0	0	0	0	1	1	0	0
24	72	0	1	0	0	0	0	1	0	1	0	0	1	1	0	0
25	62	0	0	0	0	0	0	0	0	0	0	0	0	0	1	0
26	68	0	0	0	1	0	1	1	0	0	1	1	0	0	1	0
27	62	0	0	0	1	0	1	1	0	0	0	0	0	0	2	1
28	67	0	1	0	0	0	0	0	0	0	1	1	0	0	1	0
29	68	0	0	0	0	0	0	0	0	0	2	1	0	0	1	0
30	74	0	1	0	0	0	0	0	0	0	2	1	0	0	1	0
31	66	0	1	0	1	1	0	0	0	0	0	0	0	0	1	0
32	65	0	1	0	0	0	0	1	0	1	1	1	0	0	1	0
33	69	0	0	0	0	0	0	0	0	0	0	0	0	0	1	0
34	64	0	1	0	0	0	0	0	0	1	0	0	0	0	0	0
35	69	0	0	0	0	0	0	0	0	0	0	0	0	0	1	0
36	67	0	1	0	1	0	0	1	0	0	1	1	1	1	1	0
37	75	1	0	1	1	0	0	1	0	0	0	0	0	0	0	0
38	85	1	1	0	0	0	0	0	0	0	0	0	0	0	0	0
39	66	0	0	0	0	0	0	0	0	0	1	1	0	0	1	0
40	65	0	1	0	0	0	0	0	0	0	0	0	0	0	1	0
41	81	1	1	0	1	9	9	1	0	0	0	0	0	0	0	0
42	67	0	0	0	0	0	0	0	0	0	0	0	0	0	1	0
43	69	0	0	1	1	0	0	1	0	0	0	0	0	0	1	0
44	62	0	1	0	0	0	0	1	0	0	0	0	0	0	1	0
45	65	0	1	0	0	0	0	0	0	0	0	0	0	0	1	0
46	69	0	1	0	0	1	0	0	0	0	1	1	0	0	2	1
47	62	0	1	0	0	0	0	0	0	0	1	1	0	0	1	0
48	77	1	0	0	0	0	0	0	0	0	1	1	0	0	1	0
49	71	0	0	0	0	0	0	0	0	0	0	0	0	0	0	0
50	62	0	1	0	0	0	0	1	0	1	0	0	0	0	1	0
51	88	1	0	0	0	0	0	0	0	0	1	1	0	0	0	0
52	74	0	1	0	0	0	0	0	0	0	0	0	0	0	0	0
53	67	0	0	0	1	0	0	1	0	0	0	0	0	0	0	0
54	68	0	1	1	1	0	1	1	0	0	0	0	1	1	1	0
55	65	0	1	0	0	0	0	0	0	1	1	1	0	0	0	0
56	69	0	1	0	0	0	0	1	0	0	0	0	0	0	1	0
57	68	0	0	0	1	0	1	1	0	0	1	1	0	0	1	0
58	75	1	1	0	0	0	0	1	0	0	1	1	0	0	1	0
59	68	0	0	0	0	0	1	0	0	0	1	1	0	0	1	0
60	68	0	1	0	0	0	0	0	0	0	0	0	0	0	1	0
61	82	1	0	0	1	0	0	0	0	0	2	1	2	1	2	1
62	76	1	0	1	1	0	0	1	0	0	1	1	0	0	2	1
63	80	1	1	0	0	9	9	0	0	0	0	0	0	0	1	0
64	74	0	1	0	1	0	0	0	0	0	0	0	0	0	1	0
65	77	1	0	0	1	0	0	0	0	0	1	1	0	0	1	0
66	65	0	1	0	0	0	0	0	0	0	1	1	0	0	1	0
67	68	0	0	0	0	0	1	0	0	0	1	1	0	0	1	0
68	73	0	0	0	0	0	0	0	0	0	2	1	0	0	1	0
69	64	0	0	1	1	0	0	0	0	0	0	0	0	0	0	0
70	64	0	0	0	0	0	1	1	0	0	0	0	0	0	1	0
71	65	0	0	0	0	0	0	0	0	0	0	0	0	0	1	0
72	80	1	0	0	0	0	0	0	0	0	1	1	0	0	1	0
73	70	0	0	0	0	0	1	0	0	0	0	0	1	1	2	1
74	64	0	1	0	0	0	0	0	0	0	0	0	0	0	0	0
75	71	0	0	0	1	0	0	0	0	0	0	0	0	0	0	0
76	64	0	1	0	0	0	0	0	1	1	0	0	0	0	0	0
77	70	0	0	1	1	0	0	0	0	0	0	0	0	0	0	0
78	69	0	1	0	0	0	1	0	0	0	0	0	0	0	2	1
79	72	0	0	0	0	0	0	0	0	0	1	1	0	0	0	0
80	69	0	0	0	0	1	0	1	0	0	1	1	0	0	1	0
81	72	0	0	0	0	0	0	0	0	0	1	1	0	0	1	0
82	65	0	0	0	1	0	0	0	0	0	0	0	0	0	1	0
83	66	0	0	0	1	0	0	0	0	0	0	0	0	0	1	0
84	73	0	1	0	0	0	0	0	0	0	0	0	0	0	0	0
85	72	0	0	1	1	0	0	0	0	0	1	1	1	1	2	1
86	78	1	1	0	1	0	0	0	0	0	0	0	0	0	0	0
87	77	1	1	0	0	0	0	1	0	0	1	1	1	1	1	0
88	67	0	0	0	0	0	1	1	0	0	0	0	0	0	1	0
89	74	0	0	0	0	0	1	1	0	0	1	1	1	1	2	1
90	63	0	1	0	0	0	0	0	1	1	1	1	0	0	2	1
91	61	0	1	1	0	0	0	0	0	0	0	0	0	0	1	0
92	65	0	0	0	0	0	0	0	0	1	0	0	0	0	1	0
93	65	0	0	0	0	0	0	0	0	0	0	0	0	0	0	0
94	62	0	0	0	0	0	1	0	0	0	0	0	0	0	1	0
95	65	0	0	0	1	9	9	0	0	0	1	1	0	0	0	0
96	69	0	0	0	1	0	0	0	0	0	0	0	0	0	0	0
97	67	0	1	0	1	0	0	1	0	0	1	1	0	0	2	1
98	67	0	1	0	1	0	1	0	0	0	1	1	0	0	1	0
99	63	0	1	0	0	1	0	0	0	0	0	0	0	0	0	0
100	66	0	0	0	1	0	0	1	0	0	0	0	0	0	1	0
101	69	0	1	0	0	0	0	0	0	0	0	0	0	0	0	0
102	72	0	0	0	0	0	0	0	0	1	2	1	0	0	1	0
103	74	0	1	0	1	0	0	0	0	1	0	0	0	0	1	0
104	83	1	1	0	0	0	0	0	0	0	0	0	0	0	0	0
105	75	1	1	0	0	0	0	0	0	0	1	1	0	0	1	0
106	76	1	1	0	1	0	0	0	0	0	0	0	0	0	0	0
107	66	0	0	1	1	0	1	1	0	0	0	0	0	0	1	0
108	72	0	0	0	0	0	0	0	0	0	0	0	0	0	1	0
109	69	0	1	0	1	0	0	0	0	0	0	0	0	0	0	0
110	69	0	0	0	1	0	0	1	0	0	0	0	0	0	0	0
111	70	0	1	0	0	0	0	0	0	0	0	0	0	0	1	0
112	65	0	1	0	1	0	0	0	0	0	0	0	0	0	1	0
113	75	1	1	0	0	0	0	0	0	0	0	0	0	0	0	0
114	70	0	0	0	0	0	0	0	0	0	0	0	0	0	1	0
115	66	0	1	0	0	1	0	0	0	0	1	1	0	0	1	0
116	67	0	0	1	1	0	0	0	0	0	0	0	0	0	1	0
117	63	0	1	0	0	0	0	0	0	1	0	0	0	0	0	0
118	71	0	1	0	0	0	0	0	0	0	0	0	0	0	1	0
119	62	0	0	0	0	0	0	0	0	0	0	0	0	0	1	0
120	71	0	0	0	0	0	0	0	0	0	0	0	0	0	1	0
121	68	0	0	0	0	0	0	1	0	0	0	0	0	0	1	0
122	70	0	1	0	0	0	0	1	0	1	0	0	0	0	0	0
123	70	0	0	0	1	0	0	0	0	0	0	0	0	0	1	0
124	70	0	0	0	0	0	0	0	0	0	2	1	0	0	2	1
125	69	0	1	0	1	0	0	0	1	0	1	1	1	1	1	0
126	84	1	1	0	1	0	0	0	0	0	1	1	0	0	0	0
127	69	0	0	0	1	0	0	0	0	0	0	0	1	1	1	0
128	72	0	1	1	1	0	1	0	0	0	0	0	0	0	1	0
129	62	0	0	0	1	0	0	0	0	0	1	1	0	0	1	0
130	67	0	0	0	0	0	0	0	0	1	0	0	0	0	1	0
131	62	0	0	0	0	0	1	0	0	0	0	0	0	0	1	0
132	69	0	0	1	1	0	1	0	0	1	1	1	0	0	0	0
133	67	0	0	1	1	0	0	0	0	0	0	0	0	0	1	0
134	64	0	1	0	1	0	0	0	0	0	0	0	0	0	0	0
135	63	0	1	0	1	0	0	1	0	0	1	1	0	0	0	0
136	69	0	0	0	0	1	0	0	0	0	1	1	0	0	1	0
137	69	0	0	0	0	0	0	0	0	0	1	1	0	0	0	0
138	62	0	0	0	0	0	1	0	0	0	2	1	0	0	1	0
139	73	0	0	0	0	1	0	0	0	0	2	1	0	0	2	1
140	69	0	0	0	0	0	0	1	0	0	0	0	0	0	1	0
141	67	0	0	0	1	0	0	0	0	0	0	0	0	0	0	0
142	76	1	0	0	0	0	1	0	0	0	0	0	0	0	0	0
143	68	0	0	0	1	0	0	0	0	0	0	0	0	0	1	0
144	63	0	1	0	0	0	0	0	0	0	0	0	0	0	0	0
145	64	0	0	0	1	0	0	0	0	0	1	1	0	0	1	0
146	69	0	1	1	0	0	0	0	0	0	1	1	0	0	1	0
147	85	1	1	0	1	0	0	0	0	0	0	0	0	0	0	0
148	64	0	0	0	0	0	0	0	0	0	1	1	0	0	0	0
149	74	0	1	0	0	0	0	0	0	0	0	0	0	0	0	0
150	73	0	0	0	0	0	1	0	0	0	0	0	0	0	1	0
151	64	0	1	0	0	0	0	0	0	0	0	0	0	0	0	0
152	67	0	0	0	0	0	1	0	0	0	2	1	0	0	2	1
153	61	0	0	0	0	0	0	0	0	0	1	1	0	0	0	0
154	70	0	0	1	1	0	0	1	0	0	0	0	0	0	1	0
155	62	0	0	0	1	0	0	1	0	0	0	0	0	0	0	0
156	65	0	1	0	0	0	1	0	0	1	0	0	0	0	1	0
157	65	0	0	0	0	0	0	0	0	0	0	0	0	0	0	0
158	72	0	0	1	1	0	0	0	0	0	0	0	0	0	0	0
159	78	1	0	0	0	0	0	0	0	0	0	0	0	0	0	0
160	65	0	1	0	1	0	0	0	0	0	1	1	0	0	0	0
161	67	0	0	0	1	0	0	1	0	0	0	0	0	0	1	0
162	74	0	1	0	0	0	0	0	0	0	1	1	0	0	1	0
163	72	0	1	0	1	0	0	0	0	0	0	0	0	0	0	0
164	61	0	0	0	0	0	0	0	0	0	1	1	0	0	1	0
165	75	1	1	0	0	0	0	0	0	0	0	0	0	0	0	0
166	69	0	0	0	1	0	0	0	0	0	2	1	0	0	2	1
167	65	0	0	0	0	0	0	0	0	0	1	1	0	0	1	0
168	66	0	0	0	0	0	0	0	0	0	0	0	0	0	0	0
169	64	0	0	0	1	0	0	0	0	0	0	0	0	0	1	0
170	68	0	1	0	1	1	0	1	0	0	2	1	0	0	1	0
171	73	0	0	0	1	0	0	1	0	0	0	0	0	0	0	0
172	70	0	0	1	1	0	1	1	0	0	1	1	0	0	2	1
173	67	0	0	0	1	0	0	0	0	0	1	1	0	0	1	0
174	63	0	0	0	0	0	0	0	0	0	0	0	0	0	0	0
175	66	0	0	0	0	0	0	1	0	0	0	0	0	0	1	0
176	61	0	1	0	0	0	0	0	0	0	1	1	0	0	2	1
177	68	0	1	0	1	0	1	1	0	0	1	1	0	0	1	0
178	78	1	0	0	1	0	0	0	0	0	0	0	0	0	0	0
179	74	0	0	0	0	0	0	1	0	0	2	1	0	0	2	1
180	75	1	0	1	1	0	0	0	0	0	1	1	0	0	2	1
181	66	0	1	0	1	0	1	0	0	0	0	0	0	0	0	0
182	71	0	0	1	1	0	0	0	0	0	0	0	0	0	0	0
183	61	0	0	0	0	0	0	1	0	0	1	1	0	0	2	1
184	77	1	1	0	0	0	0	0	0	0	0	0	0	0	0	0
185	68	0	0	1	1	0	1	1	0	1	1	1	0	0	1	0
186	69	0	0	0	1	0	0	0	0	0	1	1	1	1	2	1
187	70	0	1	0	0	0	1	1	0	0	1	1	0	0	0	0
188	66	0	1	0	1	0	0	1	0	0	0	0	0	0	0	0
189	69	0	1	0	1	0	0	1	1	1	0	0	0	0	0	0
190	70	0	0	0	1	0	0	1	0	0	1	1	0	0	1	0
191	69	0	1	0	1	1	0	1	0	0	0	0	0	0	1	0
192	72	0	0	1	1	0	1	0	0	0	0	0	0	0	0	0
193	79	1	0	0	1	0	0	0	0	0	0	0	0	0	1	0
194	65	0	1	1	0	0	0	1	0	0	1	1	0	0	2	1
195	68	0	1	0	0	0	0	0	0	1	1	1	0	0	1	0
196	61	0	0	0	1	0	1	0	0	0	0	0	0	0	1	0
197	65	0	1	0	1	9	9	1	1	0	2	1	2	1	2	1
198	66	0	1	0	0	0	0	0	0	0	0	0	0	0	1	0
199	61	0	0	0	0	0	0	0	0	0	1	1	0	0	1	0
200	62	0	0	0	1	0	0	1	0	0	1	1	0	0	1	0
201	61	0	0	0	0	0	0	1	0	0	0	0	0	0	1	0
202	62	0	0	0	1	0	1	0	0	0	0	0	0	0	1	0
203	67	0	1	0	0	0	0	0	0	0	0	0	0	0	0	0
204	67	0	0	0	0	0	0	1	0	0	0	0	0	0	0	0
205	82	1	1	0	0	0	1	1	0	1	0	0	0	0	0	0
206	65	0	1	0	0	0	1	1	0	0	0	0	0	0	1	0
207	75	1	0	0	1	0	0	1	0	0	0	0	0	0	0	0
208	62	0	0	1	0	0	1	0	0	0	1	1	1	1	0	0
209	77	1	1	0	1	1	0	1	0	0	1	1	0	0	1	0
210	72	0	0	0	1	0	0	0	0	0	0	0	1	1	1	0
211	70	0	0	0	1	0	0	1	0	0	1	1	0	0	1	0
212	67	0	0	0	0	0	0	0	0	0	0	0	0	0	1	0
213	65	0	0	1	1	0	1	0	0	0	1	1	1	1	0	0
214	72	0	0	1	1	0	1	0	0	0	2	1	1	1	1	0
215	70	0	1	1	1	0	1	0	0	0	1	1	1	1	1	0
216	78	1	0	1	1	0	1	1	0	0	0	0	0	0	1	0
217	63	0	0	0	0	0	0	0	0	0	0	0	0	0	1	0
218	72	0	0	0	0	0	0	0	0	0	0	0	0	0	0	0
219	65	0	1	0	1	0	0	1	0	0	0	0	1	1	1	0
220	74	0	1	1	1	0	1	1	0	0	0	0	0	0	1	0
221	72	0	0	0	0	0	0	0	0	0	0	0	0	0	0	0
222	66	0	0	0	0	0	1	1	0	0	2	1	0	0	1	0
223	75	1	0	1	1	1	0	1	0	0	1	1	0	0	1	0
224	73	0	0	1	1	0	0	1	0	0	0	0	1	1	1	0
225	66	0	0	0	0	0	0	0	0	0	1	1	1	1	0	0
226	63	0	0	0	1	0	0	0	0	0	0	0	0	0	1	0
227	70	0	1	0	1	0	0	0	0	0	1	1	0	0	2	1
228	65	0	0	0	0	0	0	0	0	0	1	1	0	0	0	0
229	75	1	1	0	0	0	0	0	0	1	0	0	0	0	0	0
230	85	1	1	1	1	0	0	0	0	0	0	0	0	0	0	0
231	80	1	0	0	0	0	0	0	0	0	2	1	0	0	1	0
232	65	0	0	1	1	0	1	0	0	0	0	0	0	0	1	0
233	70	0	0	0	1	0	0	0	0	0	0	0	0	0	0	0
234	75	1	0	1	1	0	0	0	0	0	2	1	0	0	1	0
235	78	1	0	0	0	0	0	0	0	0	1	1	0	0	0	0
236	64	0	0	0	0	0	1	0	0	0	0	0	0	0	1	0
237	77	1	0	0	1	0	1	1	0	0	0	0	0	0	1	0
238	73	0	1	0	0	0	0	0	0	0	0	0	1	1	0	0
239	62	0	0	0	0	0	0	0	0	0	0	0	0	0	0	0
240	72	0	0	1	1	0	0	0	0	0	1	1	0	0	2	1
241	84	1	1	0	0	0	0	1	0	0	0	0	0	0	0	0
242	66	0	1	0	0	0	0	0	0	1	0	0	0	0	1	0
243	83	1	0	0	1	0	0	0	0	0	0	0	0	0	1	0
244	77	1	0	0	0	0	0	0	0	0	0	0	0	0	1	0
245	67	0	1	0	0	0	1	1	0	0	0	0	1	1	0	0
246	66	0	0	0	1	0	0	0	0	0	0	0	0	0	1	0
247	63	0	0	0	0	0	0	0	0	0	0	0	0	0	0	0
248	75	1	1	1	0	0	1	0	0	0	0	0	0	0	0	0
249	75	1	0	0	1	0	0	1	0	0	0	0	0	0	2	1
250	65	0	0	0	0	0	0	0	0	0	1	1	0	0	1	0
251	70	0	0	0	1	0	0	0	0	0	0	0	0	0	1	0
252	71	0	1	0	1	0	0	1	0	0	0	0	0	0	0	0
253	71	0	0	0	1	0	0	0	0	0	1	1	0	0	2	1
254	63	0	0	0	0	0	0	0	0	0	0	0	0	0	1	0
255	71	0	0	0	0	1	0	0	0	0	0	0	0	0	1	0
256	70	0	0	1	1	0	0	0	0	0	0	0	0	0	1	0
257	62	0	0	0	1	0	0	0	0	0	0	0	1	1	1	0
258	66	0	0	0	0	0	0	0	0	1	0	0	1	1	1	0
259	65	0	1	0	1	0	0	0	0	0	0	0	1	1	1	0
260	73	0	1	0	1	0	0	0	0	0	2	1	0	0	1	0
261	73	0	1	1	1	1	1	1	0	0	0	0	0	0	1	0
262	73	0	1	1	1	1	0	1	0	0	1	1	0	0	2	1
263	70	0	1	0	0	0	0	0	0	0	1	1	0	0	0	0
264	72	0	0	1	1	0	1	0	0	0	1	1	0	0	1	0
265	66	0	0	0	0	0	0	0	0	0	0	0	0	0	0	0
266	75	1	1	0	0	0	0	1	0	0	1	1	1	1	2	1
267	71	0	0	0	1	0	0	0	0	0	0	0	0	0	1	0
268	63	0	0	0	0	0	0	0	0	0	1	1	0	0	1	0
269	67	0	0	0	1	0	0	0	0	0	0	0	0	0	1	0
270	64	0	0	0	0	0	1	1	0	0	1	1	0	0	0	0
271	67	0	1	0	1	0	1	0	0	0	1	1	0	0	0	0
272	63	0	0	1	1	0	0	0	0	0	0	0	0	0	0	0
273	67	0	0	0	1	0	0	0	0	0	0	0	0	0	0	0
274	72	0	1	0	0	0	0	0	0	0	0	0	0	0	0	0
275	70	0	0	0	0	0	0	0	0	0	1	1	0	0	1	0
276	62	0	0	0	0	0	0	0	0	0	0	0	0	0	2	1
277	70	0	0	0	1	0	0	0	0	0	0	0	0	0	1	0
278	64	0	0	0	0	0	0	0	0	0	0	0	0	0	1	0
279	64	0	0	0	0	0	0	1	0	0	0	0	0	0	1	0
280	65	0	1	0	0	0	1	0	1	0	0	0	0	0	0	0
281	69	0	0	1	1	0	0	0	0	0	0	0	0	0	1	0
282	62	0	0	0	1	0	0	0	0	0	0	0	0	0	1	0
283	67	0	0	0	0	0	0	0	0	0	1	1	0	0	1	0
284	69	0	1	1	0	0	0	0	0	0	1	1	0	0	0	0
285	70	0	0	0	1	0	0	0	0	0	0	0	0	0	1	0
286	71	0	1	0	0	0	0	0	0	0	0	0	0	0	1	0
287	78	1	0	0	1	1	0	0	0	0	1	1	1	1	2	1
288	62	0	0	0	0	0	0	0	0	0	1	1	0	0	2	1
289	80	1	1	1	0	0	1	0	0	1	1	1	0	0	0	0
290	71	0	0	0	0	0	0	0	0	0	0	0	0	0	0	0
291	66	0	1	1	1	0	0	1	0	1	1	1	1	1	0	0
292	62	0	0	0	1	0	0	1	0	0	1	1	0	0	1	0
293	68	0	1	1	0	0	0	0	0	0	0	0	0	0	1	0
294	63	0	0	0	0	0	1	0	0	0	0	0	0	0	0	0
295	70	0	0	0	0	0	0	0	0	0	0	0	0	0	2	1
296	68	0	1	0	1	0	0	0	0	0	0	0	0	0	0	0
297	65	0	1	0	0	0	0	0	0	1	1	1	0	0	1	0
298	65	0	0	0	0	0	0	1	0	0	1	1	0	0	1	0
299	72	0	0	1	1	0	0	1	0	0	1	1	0	0	1	0
300	76	1	0	0	0	0	0	0	0	0	0	0	0	0	1	0
301	72	0	0	0	0	0	0	0	0	0	0	0	0	0	1	0
302	66	0	0	1	1	0	0	0	0	0	1	1	0	0	1	0
303	74	0	1	0	0	0	0	0	0	0	1	1	0	0	1	0
304	70	0	0	0	0	0	0	0	0	0	1	1	0	0	2	1
305	78	1	1	1	0	1	0	0	0	0	1	1	0	0	1	0
306	70	0	1	0	1	0	0	0	0	0	0	0	0	0	1	0
307	66	0	0	0	0	0	0	0	0	0	0	0	0	0	1	0
308	69	0	0	0	0	0	0	0	0	0	0	0	0	0	0	0
309	69	0	1	0	0	0	0	0	0	0	0	0	0	0	1	0
310	64	0	0	0	0	0	0	0	0	0	0	0	0	0	1	0
311	71	0	0	0	0	0	1	0	0	0	1	1	0	0	1	0
312	62	0	1	0	0	0	0	0	0	0	0	0	0	0	0	0
313	61	0	1	0	0	0	0	0	0	0	1	1	1	1	0	0
314	77	1	0	1	1	0	0	0	0	0	0	0	0	0	1	0
315	76	1	0	0	0	0	0	0	0	0	1	1	0	0	1	0
316	66	0	1	0	1	0	0	1	0	0	1	1	0	0	1	0
317	78	1	0	0	1	1	0	0	0	0	1	1	1	1	1	0
318	70	0	0	0	1	0	0	1	0	0	1	1	0	0	1	0
319	64	0	1	0	0	0	0	0	0	0	0	0	0	0	1	0
320	65	0	0	0	1	0	1	0	0	0	1	1	0	0	1	0
321	84	1	0	1	0	0	1	1	0	0	0	0	0	0	0	0
322	74	0	0	1	0	0	1	1	0	0	1	1	0	0	1	0
323	65	0	1	0	0	0	0	0	0	0	0	0	0	0	0	0
324	68	0	0	0	0	0	0	1	0	0	1	1	0	0	1	0
325	69	0	1	0	1	0	0	0	0	0	0	0	0	0	1	0
326	72	0	0	1	1	0	0	1	0	0	1	1	0	0	2	1
327	70	0	1	0	1	0	0	0	0	1	0	0	0	0	0	0
328	71	0	1	0	1	0	1	0	0	0	0	0	0	0	1	0
329	79	1	1	0	1	0	0	0	0	1	0	0	1	1	0	0
330	61	0	0	0	1	0	0	0	0	0	1	1	0	0	0	0
331	71	0	0	0	0	0	1	0	0	0	0	0	0	0	0	0
332	63	0	1	0	1	0	0	0	0	1	1	1	0	0	2	1
333	67	0	1	1	1	0	1	1	0	0	0	0	0	0	1	0
334	77	1	1	0	1	0	0	0	0	0	1	1	0	0	2	1
335	73	0	1	0	0	0	0	0	0	0	0	0	0	0	0	0
336	78	1	0	1	1	0	1	0	0	0	1	1	0	0	0	0
337	64	0	0	0	0	0	0	0	0	0	0	0	0	0	0	0
338	73	0	0	0	0	0	0	0	0	0	1	1	0	0	2	1
339	63	0	0	0	1	0	0	0	0	0	0	0	0	0	0	0
340	70	0	0	0	0	0	1	0	0	0	1	1	0	0	1	0
341	66	0	1	0	0	0	0	0	0	1	0	0	0	0	1	0
342	64	0	0	0	1	0	0	1	0	0	1	1	0	0	2	1
343	94	1	0	0	0	0	0	1	0	0	1	1	0	0	1	0
344	68	0	0	0	0	0	1	0	1	0	0	0	0	0	1	0
345	65	0	1	0	1	0	1	1	1	1	0	0	0	0	1	0
346	65	0	1	0	0	0	0	1	0	1	0	0	0	0	0	0
347	67	0	1	0	0	0	0	0	0	0	0	0	0	0	0	0
348	64	0	1	0	0	0	1	0	0	1	0	0	0	0	1	0
349	70	0	0	1	1	0	0	0	0	0	1	1	0	0	0	0
350	76	1	0	0	0	0	0	0	0	0	1	1	1	1	1	0
351	74	0	0	0	1	0	0	1	0	0	0	0	0	0	1	0
352	68	0	0	0	1	0	0	0	0	0	0	0	0	0	2	1
353	64	0	0	0	1	0	0	0	0	0	1	1	0	0	1	0
354	63	0	0	0	0	0	1	0	0	1	0	0	0	0	0	0
355	66	0	1	0	0	0	1	1	0	0	1	1	0	0	1	0
356	83	1	1	1	1	0	1	0	0	0	1	1	0	0	2	1
357	83	1	0	1	1	0	0	1	0	0	0	0	0	0	1	0
358	73	0	0	1	1	0	0	0	0	0	0	0	0	0	0	0
359	67	0	0	1	1	0	0	1	0	0	0	0	0	0	1	0
360	62	0	1	0	0	0	0	0	0	1	1	1	0	0	1	0
361	72	0	1	0	0	0	0	0	0	0	0	0	0	0	0	0
362	62	0	0	0	0	0	0	0	0	0	1	1	0	0	2	1
363	62	0	0	0	0	0	0	0	0	0	1	1	0	0	0	0
364	67	0	0	0	0	0	1	0	0	0	1	1	0	0	1	0
365	72	0	1	0	0	0	0	1	0	1	0	0	0	0	0	0
366	75	1	0	0	1	0	0	0	0	0	0	0	0	0	1	0
367	82	1	0	1	0	0	0	1	0	0	1	1	0	0	2	1
368	64	0	1	0	0	0	0	0	0	0	0	0	0	0	0	0
369	71	0	1	0	0	1	0	0	0	0	0	0	0	0	1	0
370	63	0	0	0	0	0	0	0	0	0	0	0	0	0	1	0
371	70	0	0	0	1	0	0	0	0	0	0	0	0	0	1	0
372	69	0	1	0	0	0	0	1	0	0	1	1	1	1	1	0
373	64	0	0	0	0	0	0	0	0	0	1	1	0	0	1	0
374	79	1	0	0	1	0	0	1	0	0	1	1	0	0	0	0
375	64	0	0	1	1	0	1	0	0	0	1	1	1	1	2	1
376	72	0	0	0	0	0	0	0	0	0	1	1	0	0	1	0
377	68	0	0	0	1	0	0	0	0	0	1	1	0	0	1	0
378	81	1	1	0	0	0	0	0	0	0	1	1	0	0	1	0
379	64	0	1	0	0	0	0	0	0	0	1	1	0	0	1	0
380	78	1	1	0	1	0	0	0	0	0	0	0	0	0	1	0
381	79	1	0	0	0	1	0	0	0	0	1	1	0	0	2	1
382	67	0	0	0	1	0	0	0	0	0	1	1	1	1	1	0
383	66	0	0	0	0	0	1	0	0	0	1	1	0	0	1	0
384	63	0	0	0	1	0	0	0	0	0	0	0	0	0	1	0
385	67	0	1	0	0	0	0	0	0	1	1	1	0	0	1	0
386	66	0	0	0	0	0	1	0	0	0	0	0	0	0	1	0
387	74	0	1	0	1	0	1	1	0	0	0	0	0	0	2	1
388	69	0	1	0	0	0	0	0	0	0	2	1	0	0	2	1
389	72	0	0	0	0	0	0	1	0	0	1	1	1	1	1	0
390	65	0	1	0	0	0	0	0	0	1	0	0	0	0	1	0
391	62	0	0	1	0	0	0	0	0	0	0	0	0	0	1	0
392	77	1	0	0	0	0	0	0	0	0	0	0	0	0	1	0
393	79	1	1	0	0	0	1	0	0	1	0	0	0	0	0	0
394	62	0	0	0	1	0	0	0	0	0	0	0	0	0	2	1
395	65	0	0	0	0	0	0	0	0	0	0	0	0	0	0	0
396	64	0	0	1	1	1	0	1	0	0	0	0	0	0	1	0
397	82	1	1	0	1	0	0	1	0	0	0	0	0	0	1	0
398	67	0	0	0	0	0	0	0	0	0	0	0	1	1	1	0
399	67	0	0	0	1	0	0	0	0	0	0	0	0	0	1	0
400	68	0	0	0	0	0	0	0	0	0	1	1	0	0	1	0
401	63	0	1	0	0	0	0	0	0	0	0	0	0	0	1	0
402	70	0	1	0	0	0	0	0	0	1	0	0	0	0	0	0
